# Supplementary material for: Coronavirus Disease 2019 Pandemic-Related Long-Term Chronic Impacts on Psychological Health of Perinatal Women in China
Source: PubMed Central journal article supplement — Am J Perinatol. 2023 Feb 15;41(Suppl 1):e1301–12. doi: 10.1055/a-2008-4674 (PMC11132852; doi:10.1055/a-2008-4674), 2023-02-15
Supplement: 10-1055-a-2008-4674-s22oct1648.pdf [file 10-1055-a-2008-4674-s22oct1648.pdf]

**Supplementary Table S1** Characteristics of 778 pregnant women and univariate analysis

| Characteristics             | Total<br>(n = 778) | No depression<br>321 (41.26) | Depression<br>457 (58.74) | p-Value       | No anxiety<br>520 (66.84) | Anxiety<br>258 (33.16) | p-Value       | No insomnia<br>472 (60.67) | Insomnia<br>306 (39.33) | p-Value           |
|-----------------------------|--------------------|------------------------------|---------------------------|---------------|---------------------------|------------------------|---------------|----------------------------|-------------------------|-------------------|
| Maternal age (y)            | 30.26 ± 3.98       | 30.79 ± 3.92                 | 29.90 ± 3.98              | <b>0.0019</b> | 30.54 ± 3.99              | 29.72 ± 3.90           | <b>0.0067</b> | 30.34 ± 3.98               | 30.15 ± 3.98            | 0.5066            |
| Maternal age (y)            |                    |                              |                           | <b>0.0006</b> |                           |                        | <b>0.0401</b> |                            |                         | 0.5674            |
| ≤30                         | 430 (55.27)        | 154 (47.98)                  | 276 (60.39)               |               | 274 (52.69)               | 156 (60.47)            |               | 257 (54.45)                | 173 (56.54)             |                   |
| >30                         | 348 (44.73)        | 167 (52.02)                  | 181 (39.61)               |               | 246 (47.31)               | 102 (39.53)            |               | 215 (45.55)                | 133 (43.46)             |                   |
| BMI                         | 21.28 ± 2.96       | 21.46 ± 2.96                 | 21.15 ± 2.96              | <b>0.1567</b> | 21.31 ± 2.95              | 21.21 ± 3.00           | <b>0.6512</b> | 21.25 ± 2.94               | 21.32 ± 3.01            | <b>0.7370</b>     |
| Gestation                   |                    |                              |                           | <b>0.3368</b> |                           |                        | <b>0.0032</b> |                            |                         | <b>&lt;0.0001</b> |
| First trimester             | 132 (16.97)        | 56 (17.45)                   | 76 (16.63)                |               | 98 (18.85)                | 34 (13.18)             |               | 93 (19.70)                 | 39 (12.75)              |                   |
| Second trimester            | 352 (45.24)        | 151 (47.04)                  | 201 (43.98)               |               | 243 (46.73)               | 109 (42.25)            |               | 228 (48.31)                | 124 (40.52)             |                   |
| Third trimester             | 294 (37.79)        | 114 (35.51)                  | 180 (39.39)               |               | 179 (34.42)               | 115 (44.57)            |               | 151 (31.99)                | 143 (46.73)             |                   |
| Maternal education          |                    |                              |                           | <b>0.3870</b> |                           |                        | <b>0.2536</b> |                            |                         | <b>0.2183</b>     |
| <College                    | 94 (12.08)         | 40 (12.46)                   | 54 (11.82)                |               | 59 (11.35)                | 35 (13.57)             |               | 55 (11.65)                 | 39 (12.75)              |                   |
| Undergraduate/college       | 592 (76.09)        | 236 (73.52)                  | 356 (77.90)               |               | 396 (76.15)               | 196 (75.97)            |               | 355 (75.21)                | 237 (77.45)             |                   |
| >Postgraduate or higher     | 92 (11.83)         | 45 (14.02)                   | 47 (10.28)                |               | 65 (12.50)                | 27 (10.47)             |               | 62 (13.14)                 | 30 (9.80)               |                   |
| Maternal occupation         |                    |                              |                           | <b>0.0007</b> |                           |                        | <b>0.0010</b> |                            |                         | <b>0.0259</b>     |
| Employed                    | 573 (73.65)        | 257 (80.06)                  | 316 (69.15)               |               | 402 (77.31)               | 171 (66.28)            |               | 361 (76.48)                | 212 (69.28)             |                   |
| Unemployed                  | 205 (26.35)        | 64 (19.94)                   | 141 (30.85)               |               | 118 (22.69)               | 87 (33.72)             |               | 111 (23.52)                | 94 (30.72)              |                   |
| Family annual income (Yuan) |                    |                              |                           | <b>0.0042</b> |                           |                        | <b>0.1339</b> |                            |                         | <b>0.0417</b>     |
| <50,000                     | 68 (8.74)          | 24 (7.48)                    | 44 (9.63)                 |               | 44 (8.46)                 | 24 (9.30)              |               | 38 (8.05)                  | 30 (9.80)               |                   |
| 50,000-200,000              | 448 (57.58)        | 170 (52.96)                  | 278 (60.83)               |               | 291 (55.96)               | 157 (60.85)            |               | 262 (55.51)                | 186 (60.78)             |                   |
| > 200,000                   | 262 (33.68)        | 127 (39.56)                  | 135 (29.54)               |               | 185 (35.58)               | 77 (29.84)             |               | 172 (36.44)                | 90 (29.41)              |                   |
| First pregnancy             |                    |                              |                           | <b>0.8311</b> |                           |                        | <b>0.5134</b> |                            |                         | <b>0.4139</b>     |
| Yes                         | 474 (60.93)        | 197 (61.37)                  | 277 (60.61)               |               | 321 (61.73)               | 153 (59.3)             |               | 293 (62.08)                | 181 (59.15)             |                   |
| No                          | 304 (39.07)        | 124 (38.63)                  | 180 (39.39)               |               | 199 (38.27)               | 105 (40.7)             |               | 179 (37.92)                | 125 (40.85)             |                   |
| Fertilization way           |                    |                              |                           | <b>0.1380</b> |                           |                        | <b>0.4363</b> |                            |                         | <b>0.5908</b>     |
| Natural pregnancy           | 725 (93.19)        | 294 (91.59)                  | 431 (94.31)               |               | 482 (92.69)               | 243 (94.19)            |               | 438 (92.80)                | 287 (93.79)             |                   |
| IVF                         | 53 (6.81)          | 27 (8.41)                    | 26 (5.69)                 |               | 38 (7.31)                 | 15 (5.81)              |               | 34 (7.20)                  | 19 (6.21)               |                   |
| Menstrual regularity        |                    |                              |                           | <b>0.3691</b> |                           |                        | <b>0.5795</b> |                            |                         | <b>0.5773</b>     |
| Yes                         | 618 (79.43)        | 250 (77.88)                  | 368 (80.53)               |               | 416 (80.00)               | 202 (78.29)            |               | 378 (80.08)                | 240 (78.43)             |                   |
| No                          | 160 (20.57)        | 71 (22.12)                   | 89 (19.47)                |               | 104 (20.00)               | 56 (21.71)             |               | 94 (19.92)                 | 66 (21.57)              |                   |
| Diseases before pregnancy   |                    |                              |                           | <b>0.0220</b> |                           |                        | <b>0.0510</b> |                            |                         | <b>0.5871</b>     |
| Yes                         | 98 (12.60)         | 30 (9.35)                    | 68 (14.88)                |               | 57 (10.96)                | 41 (15.89)             |               | 57 (12.08)                 | 265 (86.60)             |                   |
| No                          | 680 (87.40)        | 291 (90.65)                  | 389 (85.12)               |               | 463 (89.04)               | 217 (84.11)            |               | 415 (87.92)                | 41 (13.40)              |                   |

(Continued)

Supplementary Table S1 (Continued)

| Characteristics                            | Total<br>(n = 778) | No depression<br>321 (41.26) | Depression<br>457 (58.74) | p-Value       | No anxiety<br>520 (66.84) | Anxiety<br>258 (33.16) | p-Value | No insomnia<br>472 (60.67) | Insomnia<br>306 (39.33) | p-Value       |
|--------------------------------------------|--------------------|------------------------------|---------------------------|---------------|---------------------------|------------------------|---------|----------------------------|-------------------------|---------------|
| Paternal smoking                           |                    |                              |                           | <b>0.0234</b> |                           |                        | 0.1531  |                            |                         | 0.0442        |
| Yes                                        | 213 (27.38)        | 74 (23.05)                   | 139 (30.42)               |               | 134 (25.77)               | 79 (30.62)             |         | 117 (24.79)                | 96 (31.37)              |               |
| No                                         | 565 (72.62)        | 247 (76.95)                  | 318 (69.58)               |               | 386 (74.23)               | 179 (69.38)            |         | 355 (75.21)                | 210 (68.63)             |               |
| Paternal alcohol drinking                  |                    |                              |                           | <b>0.0320</b> |                           |                        | 0.3264  |                            |                         | 0.1845        |
| Yes                                        | 206 (26.48)        | 72 (22.43)                   | 134 (29.32)               |               | 132 (25.38)               | 74 (28.68)             |         | 117 (24.79)                | 89 (29.08)              |               |
| No                                         | 572 (73.52)        | 249 (77.57)                  | 323 (70.68)               |               | 388 (74.62)               | 184 (71.32)            |         | 355 (75.21)                | 217 (70.92)             |               |
| Family support during prenatal examination |                    |                              |                           | 0.9644        |                           |                        | 0.8280  |                            |                         | 0.5934        |
| Husband                                    | 551 (70.82)        | 226 (70.40)                  | 325 (71.12)               |               | 370 (71.15)               | 181 (70.16)            |         | 340 (72.03)                | 211 (68.95)             |               |
| Other relatives                            | 97 (12.47)         | 40 (12.46)                   | 57 (12.47)                |               | 66 (12.69)                | 31 (12.02)             |         | 58 (12.29)                 | 39 (12.75)              |               |
| No accompany                               | 130 (16.71)        | 55 (17.13)                   | 75 (16.41)                |               | 84(16.15)                 | 46(17.83)              |         | 74(15.68)                  | 56 (18.30)              |               |
| Severity of worry about COVID-19           |                    |                              |                           | <b>0.0001</b> |                           |                        | <0.0001 |                            |                         | <b>0.0012</b> |
| Very worried                               | 65 (8.35)          | 16 (4.98)                    | 49 (10.72)                |               | 20 (3.85)                 | 45 (17.44)             |         | 28 (5.93)                  | 37 (12.09)              |               |
| Worried                                    | 79 (10.15)         | 29 (9.03)                    | 50 (10.94)                |               | 45 (8.65)                 | 34 (13.18)             |         | 42 (8.90)                  | 37 (12.09)              |               |
| A little worried                           | 274 (35.22)        | 103 (32.09)                  | 171 (37.42)               |               | 182 (35.00)               | 92 (35.66)             |         | 164 (34.75)                | 110 (35.95)             |               |
| Not worried                                | 150 (19.28)        | 71 (22.12)                   | 79 (17.29)                |               | 110 (21.15)               | 40 (15.50)             |         | 102 (21.61)                | 48 (15.69)              |               |
| Not worried at all                         | 210 (26.99)        | 102 (31.78)                  | 108 (23.63)               |               | 163 (31.35)               | 47 (18.22)             |         | 136 (28.81)                | 74 (24.18)              |               |
| Delayed prenatal examinations              |                    |                              |                           | 0.6169        |                           |                        | 0.9830  |                            |                         | 0.9940        |
| Yes                                        | 33 (4.24)          | 15 (4.67)                    | 18 (3.94)                 |               | 22 (4.23)                 | 11 (4.26)              |         | 20 (4.24)                  | 13 (4.25)               |               |
| No                                         | 745 (95.76)        | 306 (95.33)                  | 439 (96.06)               |               | 498 (95.77)               | 247 (95.74)            |         | 452 (95.76)                | 293 (95.75)             |               |
| Flu-like symptoms <sup>a</sup>             |                    |                              |                           | <b>0.0003</b> |                           |                        | <0.0001 |                            |                         | <b>0.0269</b> |
| Yes                                        | 174 (22.37)        | 51 (15.89)                   | 123 (26.91)               |               | 94 (18.08)                | 80 (31.01)             |         | 93 (19.70)                 | 81 (26.47)              |               |
| No                                         | 604 (77.63)        | 270 (84.11)                  | 334 (73.09)               |               | 426 (81.92)               | 178 (68.99)            |         | 379 (80.30)                | 225 (73.53)             |               |
| The need of psychological counseling       |                    |                              |                           | <0.0001       |                           |                        | <0.0001 |                            |                         | <0.0001       |
| Yes                                        | 333 (42.80)        | 94 (29.28)                   | 239 (52.30)               |               | 184 (35.38)               | 149 (57.75)            |         | 173 (36.65)                | 160 (52.29)             |               |
| No                                         | 445 (57.20)        | 227 (70.72)                  | 218 (47.70)               |               | 336 (64.62)               | 109 (42.25)            |         | 299 (63.35)                | 146 (47.71)             |               |

Abbreviations: BMI, body mass index; COVID-19, coronavirus disease 2019; IVF, in vitro fertilization.

Note: Bold values are statistically significant with  $p < 0.05$ .

<sup>a</sup>Including cold, cough, fever ( $> 37.3^\circ$ ), chest tightness.

**Supplementary Table S2** Characteristics of 468 postpartum women and univariate analysis

| Variables                     | Total<br>(n = 468) | No depression<br>(n = 138) | Depression<br>(n = 330) | p-Value       | No anxiety<br>(n = 204) | Anxiety<br>(n = 264) | p-Value       | No insomnia<br>(n = 221) | Insomnia<br>(n = 247) | p-Value       |
|-------------------------------|--------------------|----------------------------|-------------------------|---------------|-------------------------|----------------------|---------------|--------------------------|-----------------------|---------------|
| Maternal age, years           | 31.31 ± 4.22       | 31.72 ± 4.27               | 31.14 ± 4.19            | 0.1744        | 31.41 ± 4.33            | 31.23 ± 4.13         | 0.6552        | 31.63 ± 4.24             | 31.02 ± 4.18          | 0.1191        |
| Maternal age, years           |                    |                            |                         | 0.2841        |                         |                      | 0.9150        |                          |                       | 0.2916        |
| ≤30                           | 194 (41.45)        | 52 (37.68)                 | 142 (43.03)             |               | 84 (41.18)              | 110 (41.67)          |               | 86 (38.91)               | 108 (43.72)           |               |
| >30                           | 274 (58.55)        | 86 (62.32)                 | 188 (56.97)             |               | 120 (58.82)             | 154 (58.33)          |               | 135 (61.09)              | 139 (56.28)           |               |
| BMI                           | 21.71 ± 3.42       | 21.78 ± 3.48               | 21.69 ± 3.40            | 0.7909        | 21.64 ± 3.26            | 21.77 ± 3.54         | 0.6715        | 21.72 ± 3.35             | 21.71 ± 3.49          | 0.9806        |
| Maternal education            |                    |                            |                         | 0.4986        |                         |                      | 0.5728        |                          |                       | 0.6770        |
| < College                     | 66 (14.10)         | 17 (12.32)                 | 49 (14.85)              |               | 29 (14.22)              | 37 (14.02)           |               | 31 (14.03)               | 35 (14.17)            |               |
| Undergraduate/college         | 341 (72.86)        | 102 (73.91)                | 239 (72.42)             |               | 145 (71.08)             | 196 (74.24)          |               | 159 (71.95)              | 182 (73.68)           |               |
| > Postgraduate or higher      | 61 (13.03)         | 19 (13.77)                 | 42 (12.73)              |               | 30 (14.71)              | 31 (11.74)           |               | 31 (14.03)               | 30 (12.15)            |               |
| Maternal occupation           |                    |                            |                         | <b>0.0305</b> |                         |                      | <b>0.0408</b> |                          |                       | <b>0.2907</b> |
| Employed                      | 367 (78.42)        | 117 (84.78)                | 250 (75.76)             |               | 169 (82.84)             | 198 (75.00)          |               | 178 (80.54)              | 189 (76.52)           |               |
| Unemployed                    | 101 (21.58)        | 21 (15.22)                 | 80 (24.24)              |               | 35 (17.16)              | 66 (25.00)           |               | 43 (19.46)               | 58 (23.48)            |               |
| Family annually income (Yuan) |                    |                            |                         | 0.8629        |                         |                      | 0.3114        |                          |                       | 0.7464        |
| < 50,000                      | 36 (7.69)          | 10 (7.25)                  | 26 (7.88)               |               | 12 (5.88)               | 24 (9.09)            |               | 14 (6.33)                | 22 (8.91)             |               |
| 50,000-200,000                | 281 (60.04)        | 83 (60.14)                 | 198 (60.00)             |               | 123 (60.29)             | 158 (59.85)          |               | 136 (61.54)              | 145 (58.70)           |               |
| > 200,000                     | 151 (32.26)        | 45 (32.61)                 | 106 (32.12)             |               | 69 (33.82)              | 82 (31.06)           |               | 71 (32.13)               | 80 (32.39)            |               |
| First pregnancy               |                    |                            |                         | 0.5352        |                         |                      | 0.1406        |                          |                       | 0.6324        |
| Yes                           | 268 (57.26)        | 76 (55.07)                 | 192 (58.18)             |               | 109 (53.43)             | 159 (60.23)          |               | 124 (56.11)              | 144 (58.30)           |               |
| No                            | 200 (42.74)        | 62 (44.93)                 | 138 (41.82)             |               | 95 (46.57)              | 105 (39.77)          |               | 97 (43.89)               | 103 (41.70)           |               |
| Fertilization way             |                    |                            |                         | 1.0000        |                         |                      | 0.7053        |                          |                       | 0.1577        |
| Natural pregnancy             | 455 (97.22)        | 134 (97.10)                | 321 (97.27)             |               | 199 (97.55)             | 256 (96.97)          |               | 212 (95.93)              | 243 (98.38)           |               |
| IVF                           | 13 (2.78)          | 4 (2.90)                   | 9 (2.73)                |               | 5 (2.45)                | 8 (3.03)             |               | 9 (4.07)                 | 4 (1.62)              |               |
| Menstrual regularity          |                    |                            |                         | 0.2660        |                         |                      | 0.1985        |                          |                       | 0.7040        |
| Yes                           | 397                | 121 (87.68)                | 276 (83.64)             |               | 178 (87.25)             | 219 (82.95)          |               | 186 (84.16)              | 211 (85.43)           |               |
| No                            | 71                 | 17 (12.32)                 | 54 (16.36)              |               | 26 (12.75)              | 45 (17.05)           |               | 35 (15.84)               | 36 (14.57)            |               |
| Diseases before pregnancy     |                    |                            |                         | 0.6608        |                         |                      | 0.9759        |                          |                       | 0.9935        |
| Yes                           | 53                 | 17 (12.32)                 | 36 (10.91)              |               | 23 (11.27)              | 30 (11.36)           |               | 25 (11.31)               | 28 (11.34)            |               |
| No                            | 415                | 121 (87.68)                | 294 (89.09)             |               | 181 (88.73)             | 234 (88.64)          |               | 196 (88.69)              | 219 (88.66)           |               |
| Paternal smoking              |                    |                            |                         | 0.3094        |                         |                      | 0.6993        |                          |                       | 0.7775        |
| Yes                           | 147                | 48 (34.78)                 | 99 (30.00)              |               | 66 (32.35)              | 81 (30.68)           |               | 68 (30.77)               | 79 (31.98)            |               |
| No                            | 321                | 90 (65.22)                 | 231 (70.00)             |               | 138 (67.65)             | 183 (69.32)          |               | 153 (69.23)              | 168 (68.02)           |               |

(Continued)

Supplementary Table S2 (Continued)

| Variables                            | Total<br>(n = 468) | No depression<br>(n = 138) | Depression<br>(n = 330) | p-Value | No anxiety<br>(n = 204) | Anxiety<br>(n = 264) | p-Value | No insomnia<br>(n = 221) | Insomnia<br>(n = 247) | p-Value |
|--------------------------------------|--------------------|----------------------------|-------------------------|---------|-------------------------|----------------------|---------|--------------------------|-----------------------|---------|
| Paternal alcohol drinking            |                    |                            |                         | 0.7257  |                         |                      | 0.5483  |                          |                       | 0.1250  |
| Yes                                  | 165                | 47 (34.06)                 | 118 (35.76)             |         | 75 (36.76)              | 90 (34.09)           |         | 70 (31.67)               | 95 (38.46)            |         |
| No                                   | 303                | 91 (65.94)                 | 212 (64.24)             |         | 129 (63.24)             | 174 (65.91)          |         | 151 (68.33)              | 152 (61.54)           |         |
| Family support during childbirth     |                    |                            |                         | 0.2923  |                         |                      | 0.0092  |                          |                       | 0.9175  |
| Yes                                  | 376 (80.34)        | 115 (83.33)                | 261 (79.09)             |         | 175 (85.78)             | 201 (76.14)          |         | 178 (80.55)              | 198 (80.16)           |         |
| No                                   | 92 (19.66)         | 23 (16.67)                 | 69 (20.91)              |         | 29 (14.22)              | 63 (23.86)           |         | 43 (19.46)               | 49 (19.84)            |         |
| Severity of worry about COVID-19     |                    |                            |                         | 0.0001  |                         |                      | <0.0001 |                          |                       | 0.0017  |
| Very worried                         | 71 (15.17)         | 12 (8.70)                  | 59 (17.88)              |         | 17 (8.33)               | 54 (20.45)           |         | 25 (11.31)               | 46 (18.62)            |         |
| Worried                              | 46 (9.83)          | 7 (5.07)                   | 39 (11.82)              |         | 9 (4.41)                | 37 (14.02)           |         | 17 (7.69)                | 29 (11.74)            |         |
| A little worried                     | 150 (32.05)        | 44 (31.88)                 | 106 (32.12)             |         | 65 (31.86)              | 85 (32.20)           |         | 72 (32.58)               | 78 (31.58)            |         |
| Not worried                          | 68 (14.53)         | 24 (17.39)                 | 44 (13.33)              |         | 35 (17.16)              | 33 (12.50)           |         | 31 (14.03)               | 37 (14.98)            |         |
| Not worried at all                   | 133 (28.42)        | 51 (36.96)                 | 82 (24.85)              |         | 78 (38.24)              | 55 (20.83)           |         | 76 (34.39)               | 57 (23.08)            |         |
| Delayed prenatal examinations        |                    |                            |                         | 0.3486  |                         |                      | 0.0716  |                          |                       | 0.8234  |
| Yes                                  | 76 (16.24)         | 19 (13.77)                 | 57 (17.27)              |         | 26 (12.75)              | 50 (18.94)           |         | 35 (15.84)               | 41 (16.60)            |         |
| No                                   | 392 (83.76)        | 119 (86.23)                | 273 (82.73)             |         | 178 (87.25)             | 214 (81.06)          |         | 186 (84.16)              | 206 (83.4)            |         |
| Delayed infants' vaccination         |                    |                            |                         | 0.2535  |                         |                      | 0.0529  |                          |                       | 0.3425  |
| Yes                                  | 49 (10.47)         | 11 (7.97)                  | 38 (11.52)              |         | 15 (7.35)               | 34 (12.88)           |         | 20 (9.05)                | 29 (11.74)            |         |
| No                                   | 419 (89.53)        | 127 (92.03)                | 292 (88.48)             |         | 189 (92.65)             | 230 (87.12)          |         | 201 (90.95)              | 218 (88.26)           |         |
| Flu-like symptoms <sup>a</sup>       |                    |                            |                         | 0.0014  |                         |                      | 0.0210  |                          |                       | 0.1162  |
| Yes                                  | 148 (31.62)        | 29 (21.01)                 | 119 (36.06)             |         | 53 (25.98)              | 95 (35.98)           |         | 62 (28.05)               | 86 (34.82)            |         |
| No                                   | 320 (68.38)        | 109 (78.99)                | 211 (63.94)             |         | 151 (74.02)             | 169 (64.02)          |         | 159 (71.95)              | 161 (65.18)           |         |
| The need of psychological counseling |                    |                            |                         | <0.0001 |                         |                      | <0.0001 |                          |                       | <0.0001 |
| Yes                                  | 285 (60.90)        | 52 (37.68)                 | 233 (70.61)             |         | 91 (44.61)              | 194 (73.48)          |         | 110 (49.77)              | 175 (70.85)           |         |
| No                                   | 183 (39.10)        | 86 (62.32)                 | 97 (29.39)              |         | 113 (55.39)             | 70 (26.52)           |         | 111 (50.23)              | 72 (29.15)            |         |
| Delivery modes                       |                    |                            |                         | 0.9282  |                         |                      | 0.0888  |                          |                       | 0.2005  |
| Vaginal delivery                     | 280 (59.83)        | 83 (60.14)                 | 197 (59.70)             |         | 131 (64.22)             | 149 (56.44)          |         | 139 (62.90)              | 141 (57.09)           |         |
| Cesarean delivery                    | 188 (40.17)        | 55 (39.86)                 | 133 (40.30)             |         | 73 (35.78)              | 115 (43.56)          |         | 82 (37.10)               | 106 (42.91)           |         |
| Duration after delivery              |                    |                            |                         | 0.1906  |                         |                      | 0.1358  |                          |                       | 0.5907  |
| < 6 wk                               | 73 (15.60)         | 27 (19.57)                 | 46 (13.94)              |         | 34 (16.67)              | 39 (14.77)           |         | 30 (13.57)               | 43 (17.41)            |         |
| 6 wk to 6 mo                         | 222 (47.44)        | 64 (46.38)                 | 158 (47.88)             |         | 103 (50.49)             | 119 (45.08)          |         | 109 (49.32)              | 113 (45.75)           |         |
| > 6 mo                               | 173 (36.97)        | 47 (34.06)                 | 126 (38.18)             |         | 67 (32.84)              | 106 (40.15)          |         | 82 (37.10)               | 91 (36.84)            |         |

Supplementary Table S2 (Continued)

| Variables                            | Total<br>(n = 468) | No depression<br>(n = 138) | Depression<br>(n = 330) | p-Value | No anxiety<br>(n = 204) | Anxiety<br>(n = 264) | p-Value       | No insomnia<br>(n = 221) | Insomnia<br>(n = 247) | p-Value       |
|--------------------------------------|--------------------|----------------------------|-------------------------|---------|-------------------------|----------------------|---------------|--------------------------|-----------------------|---------------|
| Neonatal birthweight                 |                    |                            |                         | 0.0677  |                         |                      | 0.6338        |                          |                       | 0.5926        |
| < 2,500 g                            | 18 (3.85)          | 8 (5.80)                   | 10 (3.03)               |         | 9 (4.41)                | 9 (3.41)             |               | 8 (3.62)                 | 10 (4.05)             |               |
| 2,500–4,000g                         | 419 (89.53)        | 124 (89.86)                | 295 (89.39)             |         | 182 (89.22)             | 237 (89.77)          |               | 197 (89.14)              | 222 (89.88)           |               |
| ≥4,000 g                             | 31 (6.62)          | 6 (4.35)                   | 25 (7.58)               |         | 13 (6.37)               | 18 (6.82)            |               | 16 (7.24)                | 15 (6.07)             |               |
| 10-min Apgar's score, median (range) | 10 (8–10)          | 10 (9–10)                  | 10 (8–10)               | 0.8589  | 10 (8–10)               | 10 (8–10)            | 0.5835        | 10 (8–10)                | 10 (8–10)             | 0.8204        |
| Premature infant                     | 20 (4.27)          | 4 (2.90)                   | 16 (4.85)               | 0.3416  | 8 (3.92)                | 12 (4.55)            | 0.7407        | 10 (4.52)                | 10 (4.05)             | 0.7992        |
| Fetal Gender                         |                    |                            |                         | 0.9234  |                         |                      | 0.3687        |                          |                       | 0.8733        |
| Male                                 | 239 (51.07)        | 70 (50.72)                 | 169 (51.21)             |         | 109 (53.43)             | 130 (49.24)          |               | 112 (50.68)              | 127 (51.42)           |               |
| Female                               | 229 (48.93)        | 68 (49.28)                 | 161 (48.79)             |         | 95 (46.57)              | 134 (50.76)          |               | 109 (49.32)              | 120 (48.58)           |               |
| Feeding patterns                     |                    |                            |                         | 0.2208  |                         |                      | <b>0.0351</b> |                          |                       | <b>0.5191</b> |
| Breastfeeding                        | 268 (57.26)        | 85 (61.59)                 | 183 (55.45)             |         | 128 (62.75)             | 140 (53.03)          |               | 130 (58.82)              | 138 (55.87)           |               |
| Nonbreastfeeding                     | 200 (42.74)        | 53 (38.41)                 | 147 (44.55)             |         | 76 (37.25)              | 124 (46.97)          |               | 91 (41.18)               | 109 (44.13)           |               |

Abbreviations: BMI, body mass index; coronavirus disease 2019; IVF, in vitro fertilization.

Note: Bold values are statistically significant with  $p < 0.05$ .<sup>a</sup>Including cold, cough, fever ( $> 37.3^{\circ}\text{C}$ ), chest tightness.
